# Supplementary material for: Specific ligation to double-stranded RNA for analysis of cellular RNA::RNA interactions
Source: PubMed Central journal article supplement — Nucleic Acids Res. 2008 Jul 15;36(16):e99. doi: 10.1093/nar/gkn445 (PMC2532711; doi:10.1093/nar/gkn445), 2008-07-15

**Supplementary Figure 1.** S1 nuclease digestion (trimming) of overhanging dsRNA over a range of substrate concentrations and reaction times.

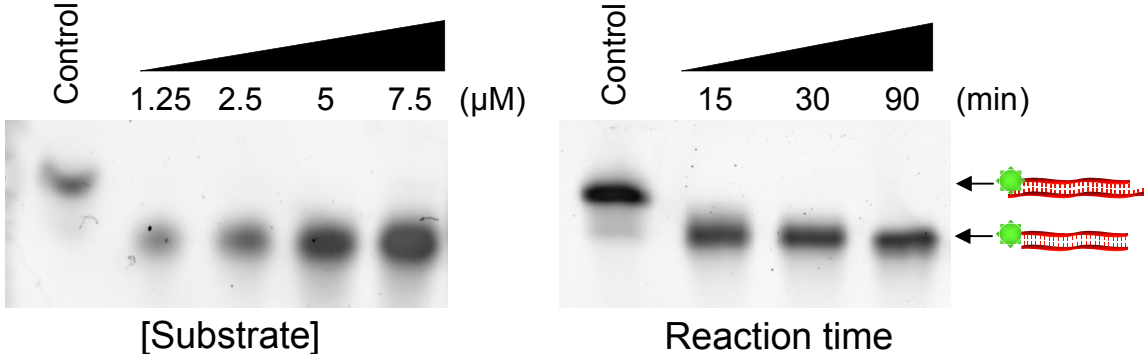

Supplement: gkn445_1.pdf [file gkn445_1.pdf]
